## **Time for Action: Assessment of Knowledge on Hazard Analysis and Critical Control Points of Food Handlers in Standard Hotels in Lagos State, Nigeria**

Habeeb Modupe Lateefat\*<sup>1</sup>, Sawyerr Olawale Henry<sup>1</sup>, Solomon Adewoye<sup>2</sup>

<sup>1</sup>Department of Environmental Health Science, Kwara State University, Malete.

<sup>2</sup>Department of Pure and Applied Biology, Ladoke Akintola University of Technology, Ogbomosho.

**Corresponding Email:** [atandalateefah@gmail.com](mailto:atandalateefah@gmail.com); [henry.sawyerr@kwasu.edu.ng](mailto:henry.sawyerr@kwasu.edu.ng),  
[soadewoye@lautech.edu.ng](mailto:soadewoye@lautech.edu.ng).

### **Abstract**

*According to the World Health Organization (WHO), there are two million reported cases of food poisoning in Nigeria with estimated deaths of 200,000 people from food poisoning and 20,000 deaths from exposure to food pesticides annually – children inclusive. These hotels make provision of letting room, food and refreshment services in restaurant, bars and banqueting rooms, conference/ mailing rooms and leisure facilities it was expressed that, threat identified with the production of food items can be minimized to a permissible limit or eliminated through the utilization of HACCP procedure. This study assessed the knowledge of HACCP of food handlers in standard hotels in Lagos State. The study adopted a cross-sectional survey research design and was conducted in Lagos. All the hotels classified by the Nigeria Tourism Development Corporation (NTDC, 2001) as either three, four or five star-rated were targeted. A purposive and stratified sampling technique was used to select the study units who constituted the respondents for the study with a total of 31 hotels involved in the study. A questionnaire was used to get information on knowledge on HACCP and its implementation by 31 food handlers. Data were presented in tables. Findings from this study has revealed that under 20% of the respondents in the various hotels use HACCP as the quality control strategy, less than 50% understand the concept of HACCP. Results also revealed that there is an insignificant relationship between years of service in the food establishment and the knowledge on HACCP at P value (0.05). More results revealed that there is no significant relation between formal training and knowledge on food safety. Results also revealed that there is no significant relationship between knowledge of HACCP by food handlers and their implementation in food preparation with P-value at (0.05). This insignificant relationship between formal training and knowledge on food safety could mean that there may be other factors preventing food handlers from implementing food safety practice, this may include time, cost of carrying out the practices or even personal attitude of the food handlers during food handling. Food handlers should be taught food safety practices practically rather than theoretically.*

**Keywords:** HACCP, Food Handlers, Foodborne disease, Food vendors, Food security, Toxicogenic, Bacteria, Hotels, Star rating.

## 1. Introduction

Food has an important role in society through affecting people's lifestyles, health, and habits, as well as being an important aspect of socializing [1, 2, 3, 4, 5, 6]. Today, hotels must pay greater attention to food safety, environmental protection, justice, human rights, and everything else connected to the ethical content of economic operations in the producing world [2, 7, 8, 9]. According to the World Health Organization (WHO), there is growing concern about food safety in hotels, which is currently estimated to account for more than two million reported cases of food poisoning in Nigeria, with 200,000 people dying from food poisoning and 20,000 dying from pesticide exposure each year – including children. Food poisoning in Nigeria is likely to cost millions of lives and trillions of naira per year come 2050 if suitable steps are not implemented to limit its spread. Food poisoning, unlike certain other health disorders, affects every nation, regardless of income or development level [10, 11, 12, 13, 14, 15, 16, 17, 18, 19]. Several studies have found that food-borne diseases impose a remarkable economic as well as quality-of-life burden on society through acute morbidity and chronic sequelae [2, 5, 6, 20, 21, 22, 23, 24, 25, 26, 27, 28, 29, 30, 31]. Food-borne infections cover a wide range of ailments and are an increasing public and environmental health concern across the world. They are the result of consuming polluted water as well as food, and range from diseases caused by a variety of microbes to those induced by chemical dangers [1, 4, 32, 33, 34, 35, 36, 37, 38, 39, 40, 41]. Thus, while gastro-intestinal symptoms are the most prevalent clinical manifestation of food-borne infections, such diseases can also cause chronic, life-threatening symptoms such as gynecological, or immunological problems, neurological, as well as multi-organ failure, cancer, as well as death. Food-borne illness is caused by a diverse range of bacteria, viruses and parasites, it is present all throughout the planet and causes human sickness almost everywhere [2, 20, 22, 28, 29]. While, staphylococcus food poisoning remains the most frequent food-borne infection in the Global South [22, 29]. The bacteria *Campylobacter*, *Salmonella*, and *E. coli* O157:H7, as well as a group of viruses, cause the most generally recognized food-borne illnesses [22, 29]. Pathogenic strains of *Staphylococcus* spp. can induce food poisoning due to the heat stable Staphylococcal enterotoxin, which is resistant to gastrointestinal enzymes. Food-borne diseases (*E. coli* and *Salmonella*) were shown to be the primary cause of these

fatalities. While, food handlers play a crucial role in maintaining food safety throughout the manufacturing, processing, storage, and preparation chains [22, 29]. Contamination by the food handler is responsible for 10 to 20% of food-borne illness outbreaks. Mishandling of food and disdain for sanitary precautions allow bacteria to enter food and, in certain situations, survive and reproduce in sufficient quantities to cause sickness in consumers. Personal hygiene and environmental sanitation are crucial in the spread of food-borne illnesses [2]. Investigations of food-borne illness and its outbreaks throughout the world reveal that, in nearly all cases, they remain caused by a failure to meet acceptable standards in the preparation, processing, and storage of food [2, 31, 42, 43, 44].

There was a report of 60 cases and 3 deaths due to food borne disease with a symptomatic gastro intestinal disorders among people who ate in a funeral service [45]. The deaths were linked to food contamination during processing, preservation and service [46]. Melese *et al.*, [47], Tuncer and Akoğlu [75] and Scott-Halsell *et al.*, [76] characterizes a hotel as a wide range of property types from bigger units having up to or possibly more than 1000 letting rooms, to littler units perhaps having as not many as 10 or even less. Hotels ordinarily provides various services within the same or of different structure which are regularly accessible for the utilization of the both resident and non-resident of the hotel. These include the provision of letting room, food and refreshment services in restaurant, bars and banqueting rooms, conference/ mailing rooms and leisure facilities Hazard analysis Critical Control Points (HACCP) has turned out to be recognized universally as the best methods for guaranteeing food safety. In 2004, the European Union (EU) embraced a few new directions on the hygiene level of food, including one (852/2004/EC) authorizing that operative in 2006, all food vendors actualize techniques dependent on the HACCP standards. Government specialists over the globe, including Canada, Australia and Japan, have embraced or are receiving the HACCP-based food safety wellbeing control framework [48; 49]. According to Scott and Stevenson, [48] it was expressed that, threat identified with the production of food items can be minimized to a permissible limit or eliminated through the utilization of HACCP procedure. There is a need to assess the knowledge of HACCP of food handlers in standard hotels in Lagos State. Thus, this study aimed to assess the knowledge of

HACCP of food handlers in standard hotels in Lagos State and its environs. The specific objectives are to evaluate the knowledge of food safety practices of the staff and management as regards HACCP compliance in three, four and five star hotels, assess the level of professional training held by both three four and five star hotel operators and their food-handlers. The study focuses on the following Hypothesis Testing (HT):

Ho<sub>1</sub>: There is no relationship between years of service and understanding of HACCP in three, four and five star hotels in Kano Metropolis.

Ho<sub>2</sub>: There is no relationship between formal training classes and application of quality control strategy in food in three, four and five star hotels in Kano Metropolis.

Ho<sub>3</sub>: There is no relationship between knowledge on HACCP and support of the hotels with implementation of HACCP procedure in three, four and five star hotels in Kano Metropolis.

## **2. Materials and Methods**

### **Study Design**

The study adopted a cross-sectional survey research design and was conducted in Lagos. All the hotels classified by the Nigeria Tourism Development Corporation (NTDC, 2001) as either three, four or five star-rated were targeted. A purposive and stratified sampling technique was used to select the study units who constituted the respondents for the study.

### **Study Area [Lagos]**

Lagos, located within latitude 6°27'14.65" N and longitude 3°23'40.81" E in the South-Western part of Nigeria is the largest city on the African continent. Based on the 2006 National Census, Lagos State has a population of 9,013,534. However, according to the New York Times publication of 7 January 2014, Lagos's population is reported to be over 21 million, comprising of a very diverse population due to heavy migration from other parts of Nigeria and surrounding countries. The Yoruba are the dominant ethnic group. Lagos is Nigeria's major commercial centre and the megacity would be the fifth biggest economy in Africa if it were a country [50, 51].

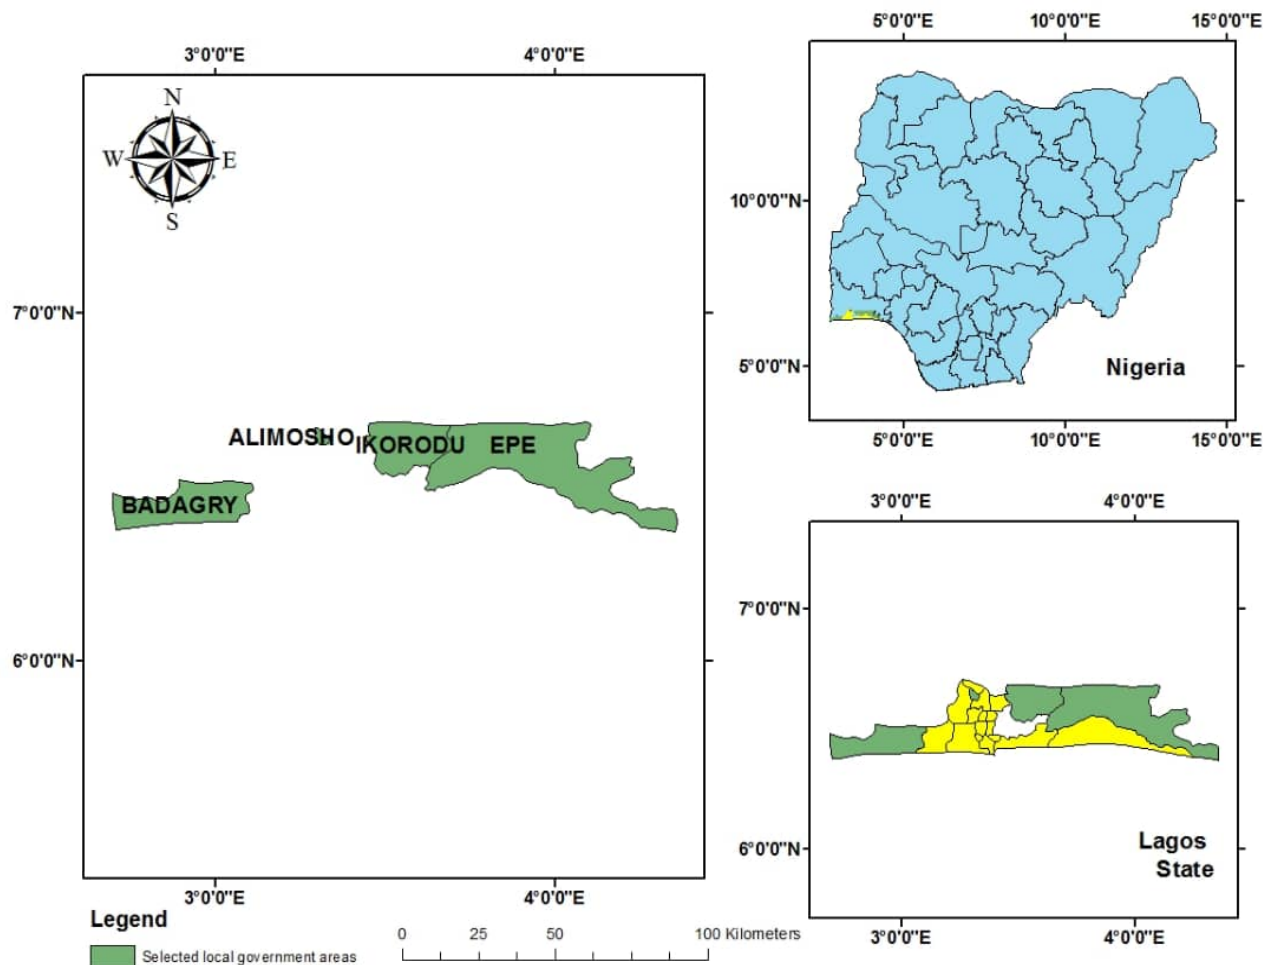

**Figure 1: Map of the Study Area in Lagos State**

### **Sampling Technique**

A purposive and stratified sampling technique was used to select the study units who constituted the respondents for the study with a total of 40 hotels sampled for the study but only 31 hotels allowed entry.

### **Study Population**

The study population comprised of all food handlers working in the hotel establishments in the study areas.

### **Inclusion Criteria**

All food handlers in hotels establishments, EHOs at the public health department were included in the study. This survey zeroed in on 3– star to 5-star hotels, that is, hotels with at least 30

rooms, private or public. This classification represents over 70% of the complete hotel stock as per Standard for National Classification and Grading of Hotels and other Serviced Accommodation in Nigeria (2001) created by Nigerian Tourism Development Corporation (NTDC) [74] as a team with Standard Organization of Nigeria (SON).\

### **Exclusion Criteria**

Food handlers working in other food establishment such as restaurants and street food vendors were excluded from this study.

### **Research Instruments**

The instruments used for data collections was semi-structured self-administered questionnaire and observation checklist, Sterile container food samples collection and sterile water container.

### **Questionnaires**

This study considered 31 semi-structured questionnaires administered to food handlers in fast food establishments and government enforcement agents responsible for food premises inspection in the study areas. The questionnaires for the food handlers were divided into sections; A, B, C, D, Close-ended questions were used in both questionnaires.

### **Statistical Analysis**

The data was cross checked before entry into a computer package called Statistical Package for the Social Sciences (SPSS) version 23. The data was analyzed using techniques such as percentages, figures, tables, as tools of descriptive data analysis which determines the group characteristics with chi-square test.

### **Limitations of the study**

- Most of the hotels did not permit more than 1 food handlers to be involved in the study because of the time factor.
- Some hotels did not allow entry into their hotels as they feel they are going to sanctioned after the study.

### 3. Results

**Table 1: Demographic Characteristics**

|                                         | <i>n</i> | <i>%</i> |
|-----------------------------------------|----------|----------|
| <b>Age</b>                              |          |          |
| <i>18-25 yrs</i>                        | 11       | 27.5     |
| <i>26-33yrs</i>                         | 25       | 62.5     |
| <i>34-41yrs</i>                         | 4        | 10.0     |
| <i>50yrs and above</i>                  | 0        | 0.0      |
| <b>Gender</b>                           |          |          |
| <i>Male</i>                             | 19       | 47.5     |
| <i>Female</i>                           | 21       | 52.5     |
| <b>Education</b>                        |          |          |
| <i>Primary</i>                          | 0        | 0.0      |
| <i>Secondary</i>                        | 0        | 0.0      |
| <i>OND/NCE</i>                          | 20       | 50.0     |
| <i>BSC/B.ED/HND</i>                     | 20       | 50.0     |
| <b>Position</b>                         |          |          |
| <i>Manager</i>                          | 11       | 27.5     |
| <i>Head cook</i>                        | 22       | 55.0     |
| <i>Cook</i>                             | 7        | 17.0     |
| <i>Waiter</i>                           | 0        | 0.0      |
| <i>Cleaner</i>                          | 0        | 0.0      |
| <b>Years of service</b>                 |          |          |
| <i>2 months</i>                         | 3        | 7.5      |
| <i>Above 3months</i>                    | 37       | 92.5     |
| <b>No. of Training Program attended</b> |          |          |

|                                                |    |      |
|------------------------------------------------|----|------|
| <i>none</i>                                    | 14 | 35.0 |
| <i>one</i>                                     | 4  | 10.0 |
| <i>two</i>                                     | 2  | 5.0  |
| <i>three</i>                                   | 10 | 25.0 |
| <i>four</i>                                    | 3  | 7.5  |
| <i>five &amp; above</i>                        | 7  | 17.5 |
| <b><i>Formal training catering classes</i></b> | 25 | 62.5 |
| <i>Yes</i>                                     |    |      |
| <i>No</i>                                      | 15 | 37.5 |
| <b><i>Certificate training</i></b>             |    |      |
| <i>Yes</i>                                     | 27 | 67.5 |
| <i>No</i>                                      | 13 | 32.5 |
| <b><i>How often do you go for training</i></b> |    |      |
| <i>Not at all</i>                              | 1  | 2.5  |
| <i>Quarterly</i>                               | 7  | 17.5 |
| <i>6 months</i>                                | 10 | 25.0 |
| <i>Yearly</i>                                  | 22 | 55.5 |

Table 2: Knowledge on Quality Control

| <i>Statements</i>                                                              | <i>n</i>  | <i>%</i>  |
|--------------------------------------------------------------------------------|-----------|-----------|
| <b><i>Do you know any quality control measures for food establishment?</i></b> |           |           |
| <i>Yes</i>                                                                     | <b>32</b> | <b>80</b> |
| <i>No</i>                                                                      | <b>8</b>  | <b>20</b> |
| <b><i>If yes, which of the measure;</i></b>                                    |           |           |
| <i>Good Manufacturing procedure</i>                                            | 6         | 15.0      |



|                                                                                          |     |      |
|------------------------------------------------------------------------------------------|-----|------|
| <i>Good Agricultural Procedure</i>                                                       | 15  | 37.5 |
| <i>Standard Operation Procedure</i>                                                      | 10  | 25.0 |
| <i>Standard Sanitation Operation Procedure</i>                                           | 7   | 17.5 |
| <i>Hazard Analysis and Critical Control Points</i>                                       | 2   | 5.0  |
| <b><i>where would you apply this quality control strategy in your food</i></b>           |     |      |
| <i>Receiving Food Products only</i>                                                      | 12  | 30.0 |
| <i>Storing food products only</i>                                                        | 0.0 | 0.0  |
| <i>Kitchen during cooking only</i>                                                       | 5   | 12.5 |
| <i>All of the above</i>                                                                  | 23  | 57.5 |
| <b><i>What kind of quality control measures do you now apart from the mentioned?</i></b> |     |      |
| <b><i>From where did you know these strategies?</i></b>                                  |     |      |
| <i>Environmental health Officers from the State and Local government</i>                 | 32  | 80   |
| <i>NAFDAC</i>                                                                            | 4   | 20.0 |
|                                                                                          |     |      |

|                                                                                        |     |      |
|----------------------------------------------------------------------------------------|-----|------|
| <i>Customer</i>                                                                        | 2   | 10.0 |
| <i>WHO/FOA</i>                                                                         | 0   | 0.0  |
| <i>Mass media</i>                                                                      | 1   | 2.5  |
| <i>Can't Remember</i>                                                                  | 1   | 2.5  |
| <b><i>Have you heard of the term "Hazard Analysis and Critical Control Points"</i></b> |     |      |
| <i>Yes</i>                                                                             | 31  | 77.5 |
| <i>No</i>                                                                              | 9   | 22.5 |
| <b><i>Do you have a written food Hygiene statement Apart from HACCP</i></b>            |     |      |
| <i>Yes</i>                                                                             | 18  | 45.0 |
| <i>No</i>                                                                              | 22  | 55.0 |
| <b><i>How would you rate your understanding on HACCP?</i></b>                          |     |      |
| <i>Excellent</i>                                                                       | 0.0 | 0    |
| <i>Good</i>                                                                            | 8   | 20.0 |
| <i>Fair</i>                                                                            | 28  | 70.0 |
| <i>Poor</i>                                                                            | 2   | 5.0  |
| <i>Very Poor</i>                                                                       | 2   | 5.0  |

Table 3: **Relationship between years of service and understanding of the term" Hazard Analysis and Critical Control Points**

|                                    | Value             | df | Asymptotic Significance (2-sided) |
|------------------------------------|-------------------|----|-----------------------------------|
| Pearson Chi-Square                 | .942 <sup>a</sup> | 1  | .332                              |
| Continuity Correction <sup>b</sup> | .063              | 1  | .801                              |
| Likelihood Ratio                   | 1.599             | 1  | .206                              |
| Fisher's Exact Test                |                   |    |                                   |

|                              |      |   |      |
|------------------------------|------|---|------|
| Linear-by-Linear Association | .918 | 1 | .338 |
| N of Valid Cases             | 40   |   |      |

Table

4: Relationship between Formal Training and Application of Quality Control Strategies in the Food Preparation

**Chi-Square Tests**

|                              | Value              | df | Asymptotic Significance (2-sided) |
|------------------------------|--------------------|----|-----------------------------------|
| Pearson Chi-Square           | 1.906 <sup>a</sup> | 2  | .386                              |
| Likelihood Ratio             | 1.910              | 2  | .385                              |
| Linear-by-Linear Association | .668               | 1  | .414                              |
| N of Valid Cases             | 40                 |    |                                   |

a. 3 cells (50.0%) have expected count less than 5. The minimum expected count is 1.88.

Table 5: **Have you heard of the term" Hazard Analysis and Critical Control Points" \* Generally, how supportive or unsupportive is your hotel with implementation of HACCP procedure**

|                                    | Value              | df | Asymptotic Significance (2-sided) |
|------------------------------------|--------------------|----|-----------------------------------|
| Pearson Chi-Square                 | 1.171 <sup>a</sup> | 1  | .279                              |
| Continuity Correction <sup>b</sup> | .484               | 1  | .487                              |
| Likelihood Ratio                   | 1.151              | 1  | .283                              |
| Fisher's Exact Test                |                    |    |                                   |
| Linear-by-Linear Association       | 1.142              | 1  | .285                              |
| N of Valid Cases                   | 40                 |    |                                   |

**4. Discussions**

From the table 1 above, a large proportion of the food handlers were between the ages on 34-41years (62.5%), while 27.5 % of the food handlers were between the ages 26-33years while (10%) were with 18-25 years. This study is relating with research done by Ulusoy and Colakoğlu [52] were most participants were aged 19–40 and over 40 (75.8% and 19.4%, respectively) in the survey on determination of HACCP knowledge of food handlers in Istanbul food businesses. This is similar to studies in Ghana by Annor and Baiden [53] who showed that majority of respondents were under thirty years. At this age, respondents are very young and are able to manage any work given to them. From the table 1 above, (50%) of the food handlers were males and 50% were females. This study is contrasting with a study by Habiballah *et al.* [54] which revealed that women, who generally prepared food, do not form the highest number in restaurant operations. In contrast to the domestic setting where more women are cooks, both men and women are formed as the cooks/chefs in Nigeria hotels as indicated in this study, with more men engaging in culinary activities which used to be a woman's job. This study is also negating a study by Martins *et al.* [55], where of the 101 food handlers questioned in this study, 96.0% were women. All male participants were in management positions in the “Food handlers’ knowledge on food hygiene: The case of a catering company in Portugal”. From the table 1 above, majority of the handlers in Lagos state revealed that (50%) have OND/NCE qualification while 10% has a qualification in BSc./Msc., while 20% of the food handlers have secondary school qualification, with another (20%) in primary school. This is in contrast with Mukhtar *et al.*, [56] where among the 350 respondents, 5.1% of the respondents did not have any formal education, 16.9% have primary education, 71.1% have secondary education, 4.6% have diploma and 2.3% have degree. Previous research found that food safety training increased knowledge regarding food safety issues [1, 2, 3, 4, 44, 57, 58]. From the table 1, a great number of the respondents in this study were Head cooks (55%), (27.5%) were managers, while 17% were cooks. This is dissimilar to the work by Rahman *et al.* [59] with respondents’ position, Cook (23%), Manager (53%). Preparation (23%). In Table 1, when asked about the years of service in the establishment, Majority (92.5%) of them has worked for more than three months in the hotel, when asked the number of training attended, (35%) never attended any training program, (10%) has attended two training programs, (5%) has

attended two, (25%) attended three training program, while (7.5%) have attended four training programs (17%) has attended five and above training programs with (62.5%) of the respondents that has attended formal food training programs and (37.5%) of the respondents not attended any formal food training programs. Leaving (67.5%) of the respondents certified and (32.5%) of the respondents not certified. This study is in contrast with Pepple, [60] where all the respondents were certified caterers who had completed course in Food Hygiene in the “Environment and Food Poisoning: Food Safety Knowledge and Practice among Food Vendors in Garki, Abuja – Nigeria”. In a related study [61] also found that less than half of the food vendors studied in Benin City, Nigeria had undergone training in food hygiene and safety. This is also in contrast with the findings obtained from the study of Bas *et al.* [62] indicated that 28.4% of managerial staff and 56.3% of basic food handlers had not received basic food hygiene training. In a study, 55% of the 444 food handlers received formal food hygiene training, and 63% of managers had undertaken formal food hygiene training in UK food businesses [63]. Results from this study implies that a large number of the respondents have undergone formal food training sessions and have been certified, thus may have better knowledge of food safety practices in food production,

### **Knowledge on Quality Control**

From the table 2 above, the respondents were asked if they know any quality control measures in food establishment, majority of the respondents (80%) said yes while a few (80%) said no in the sampling of selected hotels in Lagos state. When asked the type of quality control measure they use in their establishment. Most of them (37.5%) said Standard Operation Procedure (SOP), (25%) mentioned Good manufacturing practice (GMP), (17.0%) standard sanitation operation procedure (SSOPs), a few (15%) mentioned Good agricultural practices (GAP) while another (5%) respondents mentioned Hazard analysis and critical control points (HACCP). Findings from this study shows that the respondents have different knowledge on food quality control measures which may ensure safe production of food. In table 2 above, when asked about the where they will apply the quality control measures used, (12.5%) of the respondents said in the kitchen during cooking only, (30%) said when receiving food products only, (0%) respondents

mentioned during storage, while majority of the respondents (57.5%) mentioned all of the above. This shows that majority of the respondents understands the principles of food safety that food safety applies to all processing steps in food production. This is in line with the study carried out by Food Safety Authority of Ireland, 2001, 89% and upwards of process steps were said to have a food safety procedure associated with them in the Survey of the Implementation of HACCP (Hazard Analysis and Critical Control Point) and Food Hygiene Training in Irish Food Businesses. This is in contrast with the work by Muinde and Kuri, [64] where majority of the quality control (92%) strategy while receiving products just (8%) was applied in the kitchen only in the “hygiene practices in urban restaurants and challenges to implementing food safety and hazard analysis critical control points (HACCP) programmes in Thika town, Kenya”. In this study, the application of quality control strategy in all food process steps shows a clear understanding of its importance by the food handler. From the table 2 above, it was revealed that they heard of these quality control measures, (80%) of the respondents said they heard from Environmental health officers in the states and local government, (20%) had heard it from NAFDAC, (10%) had heard it from a customer (2.5%) had heard from mass media and others cannot remember where they heard it from. Results from this study, observes that majority of the respondents got their understanding quality control measures from EHOs in their jurisdiction, this implies that EHO’s are saddles with the responsibilities of training of food handlers on different quality control strategies. This study is in conformity with a study by Muinde and Kuri, [64] where majority (92%) of the respondent heard of quality control strategy from public health staffs and a few (8%) heard it from council staff in the “hygiene practices in urban restaurants and challenges to implementing food safety and hazard analysis critical control points (HACCP) programmes in Thika town, Kenya” Results from this study, observes that majority of the respondents got their understanding of quality control measures from EHOs in their jurisdiction, this implies that EHO’s serves a function in training of food handlers on different quality control strategies. This study is in conformity with previous study by [8, 9]. Similarly, in table 2 above, Majority of the respondents (77.5%) said they have not heard of it while (22.5%) said they have heard of the term HACCP. This present study is in contrast with study by Walker *et al*, [63] reported, 42% of managers had heard of

HACCP and 65% could not explain what it involved but in conformity with a study by Bas *et al.*, [65] declared, approximately 57% of managers they surveyed told that they had heard of the HACCP system, 18.3% of those who had heard of the term said they had a HACCP team, and the minority (21.7%) said that food handling was carried out in accordance with the principles of HACCP system. To achieve the successful implementation of HACCP, the concept must be understood first by the managers of the establishments [66]. After providing that, it is important to remember that the system needs the involvement of all personnel in the HACCP methodology and philosophy. From table 4 above, when asked if they have a written hygiene statement apart from HACCP, majority of the respondents (55%) said they do not have while a few of the respondents (45%) said they have a written hygiene statement. Results from this study interprets that with the majority of hotels without written food hygiene statement, food handlers may not remember to implement food safety practices unlike when it is written and even pasted around the kitchen environment. This study does not conform with the Food Safety Authority of Ireland, 2001 with (53%) of the respondents having a written hygiene statement. Similarly, Worsfold and Griffith [67] reported that many small food businesses lacked written hygiene procedures, performance standards and personal hygiene rules. A written hygiene statement would serve as a reminder for food handlers in keeping regular hygiene practice in food production. From table 2 above, when asked the statement “how would you rate your understanding on HACCP”, a great proportion of the respondents (70%) said “fair”, (5%) said “poor”, (5%) said “very poor”, (20%) said “Good”. This work is also similar to what is observed in the studies from Ireland by Bolton *et al.*, [68] and from Brazil by Rebouças *et al.*, [69] observed that nearly 35.0% of the participants knew what the HACCP means. This study does not conform with a study by Rombo and Muoki [70] where majority of the respondent (60%) have understanding of HACCP as a quality control measure in the Hygiene practices in urban restaurants and challenges to implementing food safety and hazard analysis critical control points (HACCP) programmes in Thika town, Kenya. Furthermore, table 2 above, majority of the respondents (60%) said there is no implementation of HACCP in their establishment and they do not have a HACCP team while few (40%) said they implement HACCP in their establishments and they have a HACCP team. This study is in contrast

with a study by Doneva-Sapceska and Alchevska [71] where (86%) of the respondents implement HACCP in their establishment and have a HACCP team or an individual with an overall responsibility on HACCP in the “Analysis of effectiveness of HACCP system in small restaurants in Skopje”. Findings from this study was that HACCP has not been widely used and that this had a negative impact on the general food hygiene standards and food-handling practices of personnel. HACCP has yet to become a legal requirement for the Turkey food industry. From table 3, A p-value results shows 0.332 with p-value set at (0.05). The null hypothesis is accepted with a p-value greater than 0.05. It shows that that there is no significant relationship between the years of service in the food establishment and the understanding of HACCP. This relates with the work by Webb and Morancie, (2015) [72], where the correlation analysis revealed there was a weak and indirect association between the length of employment in the foodservice industry and food safety knowledge. From tables 4, A p-value results shows 0.386 respectively with p-value set at (0.05). This revealed that there is no significant relationship between the formal training of food handlers and application quality control strategy in food establishment with a p-value (0.005). The Null hypothesis is accepted with a p-value greater than 0.05. This shows that the formal training of food handlers does not have a positive impact in the application of food safety strategy in different steps in the food establishment in this study. This means there could be other reasons that prevents food handlers who has undergone formal training and implementing a quality control strategy to food, these factors could be time, cost or laziness on the part of the food handlers. In table 5 above, A p-value results shows (0.279) with p-value set at (0.05). which means there is no significant relationship between the Knowledge on HACCP and the implementation in the hotels. This is similar to the study by Ko [73] where there was an insignificant relationship identified between knowledge and HACCP practices indicated that the former does not directly influence the latter, except through the mediating influence of attitude. Results from Kano and Delta revealed that there is a significant relationship between the Knowledge on HACCP and the implementation in the hotels.



## 5. Conclusion

Findings from this study has revealed that under 20% of the respondents in the various hotels uses Hazard Analysis and Critical Control Points (HACCP) as the quality control strategy, less than 50% understand the concept of HACCP. Results also revealed that there is an insignificant relationship between years of service in the food establishment and the knowledge on HACCP at p- value (0.05). This could mean that food handlers may not upgrade, regarding new food safety methods or may choose to stick their old knowledge on food safety. Findings from this study also revealed that there is no significant relation between formal training and knowledge on food safety. This could mean that there may be other factors preventing food handlers from implementing food safety practice, this may include time, cost of carrying out the practices or even personal attitude of the food handlers during food handling. Results also revealed that there is no significant relationship between knowledge of HACCP by food handlers and their implementation in food preparation with p-value at (0.05). This could be as a result of lack of time, extra cost in implementation of HACCP and unavailability of equipment's. Conclusively, the findings of this study may spur the expansion of information programs aimed at expanding food safety knowledge and raising awareness levels among the various hotels. Furthermore, the investigations allow for the consideration of coordinated measures across the various hotels in order to raise customer and staff knowledge of hotel-related features.

## 6. Recommendations

- i. Regular training programmes should be organized for handlers by their establishment by the Environmental Health Officers to acquire new knowledge on food safety.
- ii. Food handlers should be taught food safety practices practically rather than theoretical methods.
- iii. Hotel operators should employ professional HACCP consultant in the implementation of HACCP systems in their hotels.
- iv. Hotels should prepare HACCP plans for different foods in their hotels to allow timely implementation of the system.

- v. EHO's should be equipped with tools for implementation of food safety strategy and HACCP system.

### **Abbreviations**

HACCP: Hazard analysis critical control point;

WHO: World health organization

### **Data Availability**

Data used to support the findings of this study are included within the article.

### **Conflicts of Interest**

Authors declare that they have no conflicts of interest.

### **Funding:**

No financial support was received for this study.

### **Acknowledgements:**

Authors are thankful for the hotel kitchen staff who participated in this research study and also Sanitarian Raimi Morufu Olalekan for editing the article. This study was a part of a PhD Thesis of Habeeb Modupe Lateefat, (Department of Environmental Health Science, Kwara State University, Malete).

### **References**

1. Sawyerr OH, Odipe OE, Olalekan RM, *et al.* (2018) Assessment of cyanide and some heavy metals concentration in consumable cassava flour “*lafun*” across Osogbo metropolis, Nigeria. *MOJ Eco Environ Sci.* 2018;3(6):369–372. DOI: 10.15406/mojes.2018.03.00115.
2. Oluwaseun EO., Raimi MO, Nimisingha DS, Abdulraheem AF, Okolosi-Patainnocent E, Habeeb ML and Mary F (2019) Assessment of Environmental Sanitation, Food Safety Knowledge, Handling Practice among Food Handlers of Bukateria Complexes in Iju Town, Akure North of Ondo-State, Nigeria. *Acta Scientific Nutritional Health* 3.6 (2019): 186-200. DOI: 10.31080/ASNH.2019.03.0308.
3. Lateefat HM, Faith A, Yusuf AB and Raimi OM (2022) Food for the Stomach Nourishing our Future: Assessment of Potassium Bromate in Local and Packaged Bread Sold in Ilorin Metropolis. *Public H Open Acc*, 6(1): DOI: 10.23880/phoa-16000197 Medwin Publishers ISSN: 2578-5001.

4. Omotoso AJ, Omotoso EA, Morufu OR (2021) Potential Toxic levels of Cyanide and Heavy Metals in Cassava Flour Sold in Selected Markets in Oke Ogun Community, Oyo State, Nigeria, 01 July 2021, PREPRINT (Version 1) available at Research Square [<https://doi.org/10.21203/rs.3.rs-658748/v1>].
5. Lateefat MH, Opasola AO, Misbahu G, Morufu OR (2022) A Wake-Up Call: Determination of Antibiotics Residue Level in Raw Meat in Abattoir and Selected Slaughterhouses in Five Local Government in Kano State, Nigeria. bioRxiv 2022.01.04.474991; doi: <https://doi.org/10.1101/2022.01.04.474991>.  
Link: <https://en.x-mol.com/paper/article/1479559526563860480>
6. Lateefat MH, Opasola AO, Adiana BY, Ibrahim A, Morufu OR (2022) Elixirs of Life, threats to Human and Environmental Well-being: Assessment of Antibiotic Residues in Raw Meat Sold Within Central Market Kaduna Metropolis, Kaduna State, Nigeria. bioRxiv 2022.01.04.474997; doi: <https://doi.org/10.1101/2022.01.04.474997>.
7. Suleiman RM, Raimi MO and Sawyerr HO (2019) A Deep Dive into the Review of National Environmental Standards and Regulations Enforcement Agency (NESREA) Act. *International Research Journal of Applied Sciences*. pISSN: 2663-5577, eISSN: 2663-5585. DOI No. Irjas.2019.123.123. [www.scirange.com](http://www.scirange.com).  
<https://scirange.com/abstract/irjas.2019.108.125>
8. Olalekan RM (2020). “What we learn today is how we behave tomorrow”: a study on satisfaction level and implementation of environmental health ethics in Nigeria institutions. *Open Access Journal of Science*; 4(3):82-92. DOI: 10.15406/oajs.2020.04.00156.
9. Olalekan RM, Olawale SH, Christian A, Simeon AO (2020). Practitioners Perspective of Ethical Cases and Policy Responses by Professional Regulator: The Case of Environmental Health Officers Registration Council of Nigeria (EHORECON). *American Journal of Epidemiology & Public Health*. 2020;4(1): 016-023.  
<https://www.scireslit.com/PublicHealth/AJEPH-ID23.pdf>  
<https://www.scireslit.com/PublicHealth/articles.php?volume=4&issue=1>.
10. Raimi MO, Bilewu OO, Adio ZO, Abdulrahman H (2019)\_Women Contributions to Sustainable Environments in Nigeria. *Journal of Scientific Research in Allied Sciences*. 5(4), 35-51. ISSN NO. 2455-5800. DOI No. 10.26838/JUSRES.2019.5.4.104.

11. Raimi MO, Suleiman RM, Odipe OE, Salami JT, Oshatunberu M, *et al* (2019). Women Role in Environmental Conservation and Development in Nigeria. *Ecology & Conservation Science*; 1(2): DOI: 10.19080/ECO.A.2019.01.555558. Volume 1 Issue 2 - July 2019. <https://juniperpublishers.com/ecoa/pdf/ECO.A.MS.ID.555558.pdf>
12. Raimi MO, Sawyerr HO and Isah HM (2020) Health risk exposure to cypermethrin: A case study of kano state, Nigeria. *Journal of Agriculture*. 7th International Conference on Public Healthcare and Epidemiology. September 14-15, 2020 | Tokyo, Japan.
13. Olalekan RM, Muhammad IH, Okoronkwo UL, Akopjubaro EH (2020). Assessment of safety practices and farmer's behaviors adopted when handling pesticides in rural Kano state, Nigeria. *Arts & Humanities Open Access Journal*. 2020;4(5):191-201. DOI: 10.15406/ahoaj.2020.04.00170.
14. Isah, HM., Sawyerr, HO., Raimi, MO., Bashir, BG., Haladu, S. & Odipe, OE. (2020). Assessment of Commonly Used Pesticides and Frequency of Self-Reported Symptoms on Farmers Health in Kura, Kano State, Nigeria. *Journal of Education and Learning Management (JELM)*, HolyKnight, vol. 1, 31-54. doi.org/10.46410/jelm.2020.1.1.05. <https://holyknight.co.uk/journals/jelm-articles/>.
15. Isah HM, Raimi MO, Sawyerr HO, Odipe OE, Bashir BG, Suleiman H (2020) Qualitative Adverse Health Experience Associated with Pesticides Usage among Farmers from Kura, Kano State, Nigeria. *Merit Research Journal of Medicine and Medical Sciences* (ISSN: 2354-323X) Vol. 8(8) pp. 432-447, August, 2020. DOI: 10.5281/zenodo.4008682. <https://meritresearchjournals.org/mms/content/2020/August/Isah%20et%20al.htm>.
16. Hussain MI, Morufu OR, Henry OS (2021). Probabilistic Assessment of Self-Reported Symptoms on Farmers Health: A Case Study in Kano State for Kura Local Government Area of Nigeria. *Environmental Analysis & Ecology Studies* 9(1). EAES. 000701. 2021. DOI: 10.31031/EAES.2021.09.000701. Pp. 975- 985. ISSN: 2578-0336.
17. Hussain MI, Morufu OR, Henry OS (2021) Patterns of Chemical Pesticide Use and Determinants of Self-Reported Symptoms on Farmers Health: A Case Study in Kano State for Kura Local Government Area of Nigeria. *Research on World Agricultural Economy*. Vol 2, No. 1. DOI: <http://dx.doi.org/10.36956/rwae.v2i1.342>. <http://ojs.nassg.org/index.php/rwae/issue/view/31>

18. Morufu OR, Tonye VO, Ogah A, Henry AE, Abinotami WE (2021) Articulating the effect of Pesticides Use and Sustainable Development Goals (SDGs): The Science of Improving Lives through Decision Impacts. *Research on World Agricultural Economy*. Vol 2, No. 1. DOI: <http://dx.doi.org/10.36956/rwae.v2i1.347>. <http://ojs.nassg.org/index.php/rwae/issue/view/31>.
19. Morufu OR (2021). “Self-reported Symptoms on Farmers Health and Commonly Used Pesticides Related to Exposure in Kura, Kano State, Nigeria”. *Annals of Community Medicine & Public Health*. 1(1): 1002. <http://www.remedypublications.com/open-access/self-reported-symptoms-on-farmers-health-and-commonly-used-pesticides-related-6595.pdf>. <http://www.remedypublications.com/annals-of-community-medicine-public-health-home.php>.
20. Raimi, MO, Pigha, TK and Ochayi, EO (2017) Water-Related Problems and Health Conditions in the Oil Producing Communities in Central Senatorial District of Bayelsa State. *Imperial Journal of Interdisciplinary Research (IJIR) Vol-3, Issue-6, ISSN: 2454-1362*.
21. Olalekan RM, Vivien OT, Adedoyin OO, *et al.* (2018). The sources of water supply, sanitation facilities and hygiene practices in oil producing communities in central senatorial district of Bayelsa state, Nigeria. *MOJ Public Health*. 2018;7(6):337-345. DOI: 10.15406/mojph.2018.07.00265
22. Henry OS, Odipe EO, Olawale SA, Raimi MO (2019) Bacteriological Assessment of Selected Hand Dug Wells in Students’ Residential Area: A Case Study of Osun State College of Health Technology, Ilesa, Nigeria. *Global Scientific Journal*, Volume 7, Issue 1, January 2019, Online: ISSN 2320-9186. [www.globalscientificjournal.com](http://www.globalscientificjournal.com)
23. Raimi MO, Abdulraheem AF, Major I, Odipe OE, Isa HM, Onyeche C (2019). The Sources of Water Supply, Sanitation Facilities and Hygiene Practices in an Island Community: Amassoma, Bayelsa State, Nigeria. *Public Health Open Access* 2019, 3(1): 000134. ISSN: 2578-5001. DOI: 10.23880/phoa-16000134.
24. Olalekan RM, Adedoyin OO, Ayibatombira A, *et al* (2019). “Digging deeper” evidence on water crisis and its solution in Nigeria for Bayelsa state: a study of current scenario. *International Journal of Hydrology*. 2019;3(4):244-257. DOI: 10.15406/ijh.2019.03.00187.

25. Raimi MO, Omidiji AO, Adeolu TA, Odipe OE and Babatunde A (2019) An Analysis of Bayelsa State Water Challenges on the Rise and Its Possible Solutions. *Acta Scientific Agriculture* 3.8 (2019): 110-125. DOI: 10.31080/ASAG.2019.03.0572.
26. Gift RA, Olalekan RM (2020). Access to electricity and water in Nigeria: a panacea to slow the spread of Covid-19. *Open Access J Sci.* 2020;4(2):34. DOI: 10.15406/oajs.2020.04.00148. <https://medcrave.com/index.php?/articles/det/21409/>
27. Gift RA, Olalekan RM, Owobi OE, Oluwakemi RM, Anu B, Funmilayo AA (2020). Nigerians crying for availability of electricity and water: a key driver to life coping measures for deepening stay at home inclusion to slow covid-19 spread. *Open Access Journal of Science.* 2020;4(3):69-80. DOI: 10.15406/oajs.2020.04.00155.
28. Olalekan RM, Dodeye EO, Efegebere HA, Odipe OE, Deinkuro NS, Babatunde A and Ochayi EO (2020) Leaving No One Behind? Drinking-Water Challenge on the Rise in Niger Delta Region of Nigeria: A Review. *Merit Research Journal of Environmental Science and Toxicology* (ISSN: 2350-2266) Vol. 6(1): 031-049 [DOI: 10.5281/zenodo.3779288](https://doi.org/10.5281/zenodo.3779288)
29. Afolabi AS, Raimi MO (2021) When Water Turns Deadly: Investigating Source Identification and Quality of Drinking Water in Piwoyi Community of Federal Capital Territory, Abuja Nigeria. *Online Journal of Chemistry*, 2021, 1, 38-58; DOI: 10.31586/ojc.2021.010105. [www.scipublications.org/journal/index.php/ojc](http://www.scipublications.org/journal/index.php/ojc).
30. Yusuf BA, Solomon OA, Opasola AO, Habeeb ML, Abdullahi A, Morufu OR (2022) No One Is Leaving This Time: Appraisal of Awareness and Knowledge of Port Health Officers on International Health Regulation IHR (2005) bioRxiv preprint doi: <https://doi.org/10.1101/2022.01.12.476011>.
31. Habeeb ML, Opasola AO, Garba M, Olalekan MR. (2022). A Wake-Up Call: Determination of Antibiotics Residue Level in Raw Meat in Abattoir and Selected Slaughterhouses in Five Local Government in Kano State, Nigeria. *J Vet Heal Sci*, 3(1), 54-61.
32. Morufu R and Clinton E (2017). Assessment of Trace Elements in Surface and Ground Water Quality (2017) LAP Lambert Academic Publishing. Mauritius. ISBN: 978-3-659-38813-2. [www.omniscryptum.com](http://www.omniscryptum.com)

33. Raimi MO and Sabinus CE (2017) An Assessment of Trace Elements in Surface and Ground Water Quality in the Ebocha-Obrikom Oil and Gas Producing Area of Rivers State, Nigeria. *International Journal for Scientific and Engineering Research (Ijser)*: Volume 8, Issue 6, July Edition. ISSN: 2229-5518.
34. Raimi MO, and Sabinus CE. (2017) Influence of Organic Amendment on Microbial Activities and Growth of Pepper Cultured on Crude Oil Contaminated Niger Delta Soil. *International Journal of Economy, Energy and Environment*. Vol. 2, No. 4, 2017, pp. 56-76. DOI: 10.11648/j.ijeee.20170204.12.
35. Olalekan, RM., Omidiji, AO., Nimisnnga, D., Odipe, OE. and Olalekan, AS. (2018). Health Risk Assessment on Heavy Metals Ingestion through Groundwater Drinking Pathway for Residents in an Oil and Gas Producing Area of Rivers State, Nigeria. *Open Journal of Yangtze Gas and Oil*, 3, 191-206. <https://doi.org/10.4236/ojogas.2018.33017>.
36. Raimi MO (2019) 21<sup>st</sup> Century Emerging Issues in Pollution Control. 6<sup>th</sup> Global Summit and Expo on Pollution Control May 06-07, 2019 Amsterdam, Netherlands.
37. Raimi MO, Clinton IE, Olawale HS (2021) Problematic Groundwater Contaminants: Impact of Surface and Ground Water Quality on the Environment in Ebocha-Obrikom Oil and Gas Producing Area of Rivers State, Nigeria. Oral Presentation Presented at the *United Research Forum*. 2<sup>nd</sup> International E-Conference on Geological and Environmental Sustainability during July 29-30, 2021.
38. Morufu OR, Olawale HS, Clinton IE *et al.*, (2021) Quality water not everywhere: Exploratory Analysis of Water Quality Across Ebocha-Obrikom Oil and Gas Flaring Area in the Core Niger Delta Region of Nigeria, 04 October 2021, PREPRINT (Version 1) available at Research Square [<https://doi.org/10.21203/rs.3.rs-953146/v1>].
39. Morufu OR, Henry OS, Clinton IE, Gabriel S (2021) Many Oil Wells, One Evil: Potentially toxic metals concentration, seasonal variation and Human Health Risk Assessment in Drinking Water Quality in Ebocha-Obrikom Oil and Gas Area of Rivers State, Nigeria. medRxiv 2021.11.06.21266005; doi: <https://doi.org/10.1101/2021.11.06.21266005>.

40. Morufu OR, Clinton IE, Bowale A (2021) Statistical and Multivariate Techniques to Trace the Sources of Ground Water Contaminants and Affecting Factors of Groundwater Pollution in an Oil and Gas Producing Wetland in Rivers State, Nigeria.  
medRxiv 2021.12.26.21268415; doi: <https://doi.org/10.1101/2021.12.26.21268415>.
41. Morufu OR, Henry OS, Ifeanyichukwu CE, Salako G (2022) Toxicants in Water: Hydrochemical Appraisal of Toxic Metals Concentration and Seasonal Variation in Drinking Water Quality in Oil and Gas Field Area of Rivers State, Nigeria. *IntechOpen* DOI: <http://dx.doi.org/10.5772/intechopen.102656>. <https://mts.intechopen.com/online-first/259762>. ISBN 978-1-80355-526-3.
42. Raimi MO, Omidiji AO, Abdulraheem AF, Ochayi EO (2018) A Survey of Hand Washing Behaviour and Awareness among Health Care Workers in Health Care Facilities in Kubwa District of Bwari Area Council, F.C.T. Abuja, Nigeria. *Annals of Ecology and Environmental Science Volume 2, Issue 2, 2018, PP 1-18*.
43. Raimi MO, Omidiji AO, Abdulraheem AF, Ochayi EO (2018) A Survey of Hand Washing Behaviour and Awareness among Health Care Workers in Health Care Facilities in Kubwa District of Bwari Area Council, F.C.T. Abuja, Nigeria. *Annals of Ecology and Environmental Science Volume 2, Issue 2, 2018, PP 1-18*.
44. Raimi MO, Omidiji AO, Odipe OE, Suleiman HO (2019) Open Defecation and Public Toilets Importance: An Economic Perspective. *Preventing Health Care in Nigeria: Everyone, Everywhere Leaving Nobody Behind*. July 29 – August 1, 2019 National Open University Auditorium, University Village, Jabi Abuja.
45. Fatiregun, Omolara & Bakare, Omowunmi & Ayeni, Sunday & Adebawale, Oyerinde & Sowunmi, Anthonia & Popoola, Abiodun & Salako, Omolola & Alabi, Adewunmi & Joseph, Adedayo. (2020). 10-Year Mortality Pattern Among Cancer Patients in Lagos State University Teaching Hospital, Ikeja, Lagos. *Frontiers in Oncology*. 10. 573036. 10.3389/fonc.2020.573036.
46. World Health Organization (2010). Food safety. Retrieved from <http://www.who.int/foodsafety/consumer/5keys/en/>
47. Melese Abate Reta *et al* (2021). Food handling practices and associated factors among food handlers working in public food and drink service establishments in Woldia town,



- Northeast Ethiopia. Pan African Medical Journal. 2021;40(128).  
10.11604/pamj.2021.40.128.19757.
48. Scott, VN., and Stevenson, KE. (2006). HACCP: A systematic approach to food safety. Washington, D.C.
49. Osei-Kwasi H., Laar A., Zotor F., Pradeilles P., Aryeetey R., Green M (2021). The African food environment framework for creating healthy nutrition policy and interventions in urban Africa. *PloS One*;16 [[PMC free article](#)] [[PubMed](#)] [[Google Scholar](#)].
50. Koleayo OO, Morufu OR, Temitope OW, Oluwaseun EO, Amos LO (2021) Public Health Knowledge and Perception of Microplastics Pollution: Lessons from the Lagos Lagoon, 10 May 2021, PREPRINT (Version 1) available at Research Square [<https://doi.org/10.21203/rs.3.rs-506361/v1>].
51. Omoyajowo K., Raimi M., Waleola T., Odipe O., Ogunyebi A (2022) Public Awareness, Knowledge, Attitude and Perception on Microplastic Pollution around Lagos Lagoon. *Ecological Safety and Balanced use of Resources*, 2(24), 35-46. [https://doi.org/10.31471/2415-3184-2021-2\(24\)-35-46](https://doi.org/10.31471/2415-3184-2021-2(24)-35-46).
52. Ulusoy, B., Colakoğlu, N. (2015). A survey on determination of HACCP knowledge of food handlers in Istanbul food businesses. *Acta Alimentaria*, 44(3), 342-348. <https://doi.org/10.1556/AAlim.2014.0011>
53. Annor GA, Baiden EA (2011). Evaluation of food hygiene knowledge attitudes and practices of food handlers in food businesses in Accra, Ghana. *Food Nutr Sci*.2(8):830.
54. Habiballah, Mamoun & Alshakhsheer, Firas & Al-Ababneh, Mukhles. (2017). Restaurant Employees' Food Handling Practices in Irbid City, Jordan. *Journal of Tourism and Hospitality Management*. 5. 81-89. 10.15640/jthm.v5n1a9.
55. Martins, R.B., Hogg, T., Otero, J.G. (2012). Food handlers' knowledge on food hygiene: The case of a catering company in Portugal. *Food Control*, 23(1), 184-190. <https://doi.org/10.1016/j.foodcont.2011.07.008>.
56. Mukhtar Javaria, Hussain Muhammad, Kousar Pervee, Muhammad Afzal, Syed Amir Gilani (2018) Students' Perception and Readiness towards Inter-Professional Learning. *Int. J. Soc. Sc. Manage*. Vol. 5, Issue-3: 192-200 DOI: 10.3126/ijssm.v5i3.20610.

57. Lynch *et al* (2003) United States Department of Agriculture-Agricultural Research Service.
58. Kunadu AP, Ofofu DB, Aboagye E, Tano-Debrah K (2016). Food safety knowledge, attitudes and self-reported practices of food handlers in institutional foodservice in Accra, Ghana. *Food Control*;69:324-30.
59. Rehman SU, Ali F & Ahmad MU (2017) Interprofessional Education: A Basic Need of Healthcare Department in Pakistan. *International Journal of Biotechnology for Wellness Industries* 6(2): 55-63.
60. Pepple Nne. (2017). Environment and Food Poisoning: Food Safety Knowledge and Practice among Food Vendors in Garki, Abuja – Nigeria. *Journal of Health Education Research & Development*. 05. 10.4172/2380-5439.1000217.
61. Isara, AR., & Isah, EC. (2009). Knowledge and practice of food hygiene and safety among food handlers in fast food restaurants in Benin City, Edo State. *The Nigerian postgraduate medical journal*, 16(3), 207-212.
62. Baş, M., Ersun, AŞ., Kıvanç, G. (2006). The evaluation of food hygiene knowledge, attitudes, and practices of food handlers' in food businesses in Turkey. *Food Control*, 17(4), 317- 322. <https://doi.org/10.1016/j.foodcont.2004.11.006>
63. Walker, E., Pritchard, C., Forsythe, S. (2003). Food handlers' hygiene knowledge in small food businesses. *Food Control*, 14(5), 339-343. [https://doi.org/10.1016/S0956-7135\(02\)00101-9](https://doi.org/10.1016/S0956-7135(02)00101-9)
64. Muinde, OK., and Kuri, E. (2005). Hygienic and sanitary practices of vendors of street foods in Nairobi, Kenya. *African Journal of Food Agriculture & Nutritional Development*, 5(1), 1-14.
65. Bas, M., Yüksel, M. and Çavusoglu, T. (2007), “Difficulties and barriers for the implementing of HACCP and food safety systems in food businesses in Turkey”, *Food Control*, Vol.18No.2, pp.
66. Joint FAO/WHO Expert Committee on Food Additives. Meeting, & World Health Organization. (2006). *Safety evaluation of certain contaminants in food* (Vol. 82). Food & Agriculture Org.
67. Worsfold, D., & Griffith, CJ. (2003). A survey of food hygiene and safety training in the retail and catering industry. *Nutrition & Food Science*.

68. Bolton, DJ., Meally, A., Blair, IS., McDowell, DA., Cowan, C. (2008). Food safety knowledge of head chefs and catering managers in Ireland. *Food Control*, 19(3), 291-300. <https://doi.org/10.1016/j.foodcont.2007.04.006>
69. Rebouças, LT.; Santiago, LB.; Martins, LS.; Rios Menezes, AC.; Araújo, M.d.P.N.; Almeida, R.C.d.C. Food safety knowledge and practices of food handlers, head chefs and managers in hotels' restaurants of Salvador, Brazil. *Food Control* 2017, 73, 372–381.
70. Rombo, GO., & Muoki, M. (2012). Ricketts in rift valley: A review of manifestation and links with fluoride contents of drinking water supplies and food. *Global Advanced Research Journal of Biochemistry and Bio informatics*, 1(2), 019-025.
71. Doneva-Sapceska, D., & Alchevska, S. (2017). Analysis of effectiveness of HACCP system in small restaurants in Skopje. *Journal of Hygienic Engineering and Design*, 18, 11-18.
72. Webb, M., Morancie, A. (2015). Food safety knowledge of foodservice workers at a university campus by education level, experience, and food safety training. *Food Control*, 50, 259-264. <https://doi.org/10.1016/j.foodcont.2014.09.002>.
73. Ko, WH. (2013), "The relationship among food safety knowledge, attitudes and self-reported HACCP practices in restaurant employees", *Food Control*, Vol. 29 No. 1, pp. 192-197.
74. Nigerian Tourism Development Corporation (NTDC) (2001). Standard for National Classification and Grading of Hotels and Other Serviced Accommodations in Nigeria. Abuja: Nigerian Tourism Development Corporation.
75. Tuncer, A., Akoğlu, A. (2020). Food safety knowledge of food handlers working in hotel kitchens in Turkey. *Food and Health*, 6(2),77-89. <https://doi.org/10.3153/FH20009>.
76. Scott-Halsell, SA., Blum, SC., & Huffman, L. (2008). A study of emotional intelligence levels in hospitality industry professionals. *Journal of Human Resources in Hospitality & Tourism*, 7(2), 135-152.
